# Supplementary material for: Genotoxic Effects on Daphnia magna Fed with Aquatic Green Algae Exposed to Silver Nanoclusters
Source: MDPI journal article supplement (doi:10.3390/w15183172), 2023-09-05
Supplement: s1 [file s1]

## **Supplementary Materials for**

### **Genotoxic effects on *Daphnia magna* fed with aquatic green algae exposed to silver nanoclusters**

**Li Zhang<sup>1,\*</sup>, Haoqiang Tan<sup>2</sup>**

<sup>1</sup>Department of Environmental Engineering, School of Life Sciences, Taizhou University, Taizhou 318000, China

<sup>2</sup>School of Civil Engineering and Architecture, Taizhou University, Taizhou 318000, China; tanhaoqiang126@126.com

\* Correspondence: zhangli8157@sina.com

**Table S1.** The composition of SE culture medium.

| No. | Ingredient                                                                                                                                                                                                                                                            | Concentration of stock solution                                                                                                                                                                                                                                                                                                                                                                                                                                                   | Usage  |
|-----|-----------------------------------------------------------------------------------------------------------------------------------------------------------------------------------------------------------------------------------------------------------------------|-----------------------------------------------------------------------------------------------------------------------------------------------------------------------------------------------------------------------------------------------------------------------------------------------------------------------------------------------------------------------------------------------------------------------------------------------------------------------------------|--------|
| 1   | NaNO <sub>3</sub>                                                                                                                                                                                                                                                     | 25g/100mL of ultrapure water                                                                                                                                                                                                                                                                                                                                                                                                                                                      | 1mL/L  |
| 2   | K <sub>2</sub> HPO <sub>4</sub>                                                                                                                                                                                                                                       | 7.5g/100mL of ultrapure water                                                                                                                                                                                                                                                                                                                                                                                                                                                     | 1mL/L  |
| 3   | MgSO <sub>4</sub> ·7H <sub>2</sub> O                                                                                                                                                                                                                                  | 7.5g/100mL of ultrapure water                                                                                                                                                                                                                                                                                                                                                                                                                                                     | 1mL/L  |
| 4   | CaCl <sub>2</sub> ·2H <sub>2</sub> O                                                                                                                                                                                                                                  | 2.5g/100mL of ultrapure water                                                                                                                                                                                                                                                                                                                                                                                                                                                     | 1mL/L  |
| 5   | KH <sub>2</sub> PO <sub>4</sub>                                                                                                                                                                                                                                       | 17.5g/100mL of ultrapure water                                                                                                                                                                                                                                                                                                                                                                                                                                                    | 1mL/L  |
| 6   | NaCl                                                                                                                                                                                                                                                                  | 2.5g/100mL of ultrapure water                                                                                                                                                                                                                                                                                                                                                                                                                                                     | 1mL/L  |
| 7   | FeCl <sub>3</sub> ·6H <sub>2</sub> O                                                                                                                                                                                                                                  | 0.5g/100mL of ultrapure water                                                                                                                                                                                                                                                                                                                                                                                                                                                     | 1mL/L  |
| 8   | EDTA-Fe                                                                                                                                                                                                                                                               | ① 4.1 mL of concentrated hydrochloric acid was diluted with 50 mL of ultrapure water (solution one);<br>② 0.9306g of EDTA-Na <sub>2</sub> was dissolved into 50 mL of ultrapure water (solution two);<br>③ 0.901g of FeCl <sub>3</sub> ·6H <sub>2</sub> O was dissolved into 10 mL of the solution one (solution three);<br>④ 10 mL of solution two was added into solution three (solution four);<br>⑤ Solution four was then diluted to 1L of ultrapure water (stock solution). | 1mL/L  |
| 9   | H <sub>3</sub> BO <sub>3</sub><br>MnCl <sub>2</sub> ·4H <sub>2</sub> O<br>ZnSO <sub>4</sub> ·7H <sub>2</sub> O<br>Na <sub>2</sub> MoO <sub>4</sub> ·2H <sub>2</sub> O<br>CuSO <sub>4</sub> ·5H <sub>2</sub> O<br>Co(NO <sub>3</sub> ) <sub>2</sub> ·6H <sub>2</sub> O | 2.86g/100mL of ultrapure water<br>1.86g/100mL of ultrapure water<br>0.22g/100mL of ultrapure water<br>0.39g/100mL of ultrapure water<br>0.08g/100mL of ultrapure water<br>0.05g/100mL of ultrapure water                                                                                                                                                                                                                                                                          | 1mL/L  |
| 10  |                                                                                                                                                                                                                                                                       | ① 200g of garden soil with fertilizer was dissolved into 1 L of ultrapure water;<br>② The mixture was heated in boiling water for 3h, cooled down, and was deposited for 24h;<br>③ The second step was done in triplicate, and the mixture was then filtered to obtain the supernatant;<br>④ The supernatant was sterilized in a SANYO autoclave (121 °C, 30 min) and stored at 4 °C before use.                                                                                  | 40mL/L |

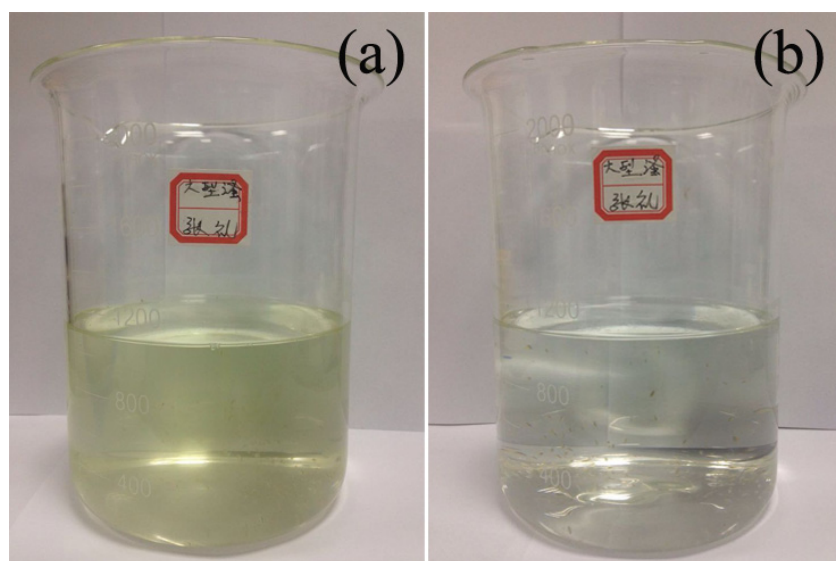

**Figure S1.** The toxicity test of *Daphnia magna* through the diet of *Scenedesmus obliquus* treated with silver nanoparticles, and two photos representing the beginning (a) and end (b) of toxicity test.

**Table S2.** Total RNA was checked using a NanoDrop 2000 UV-vis Spectrophotometer. Samples A, B, C and D represent the control (*Daphnia magna* from the diet of green algae only), *Daphnia magna* from the diet of green algae treated with 135  $\mu\text{g/L}$  r-AgNCs (without 0.5 mM of L-cysteine), *Daphnia magna* from the diet of green algae treated with 135  $\mu\text{g/L}$  r-AgNCs (with 0.5 mM of L-cysteine) and *Daphnia magna* from the diet of green algae treated with 10  $\mu\text{g/L}$  silver ions, respectively.

| Swimming<br>Lane<br>(No.) | Samples  | Concentration<br>(ng/ $\mu\text{L}$ ) | 260/280 | 260/230 | Volume<br>( $\mu\text{L}$ ) | Total<br>RNA<br>( $\mu\text{g}$ ) |
|---------------------------|----------|---------------------------------------|---------|---------|-----------------------------|-----------------------------------|
| 1                         | Sample A | 247.31                                | 2.38    | 0.88    | 40.00                       | 9.89                              |
| 2                         | Sample B | 271.21                                | 2.38    | 0.93    | 40.00                       | 10.85                             |
| 3                         | Sample C | 384.49                                | 2.27    | 1.30    | 40.00                       | 15.38                             |
| 4                         | Sample D | 277.78                                | 2.34    | 1.14    | 40.00                       | 11.11                             |

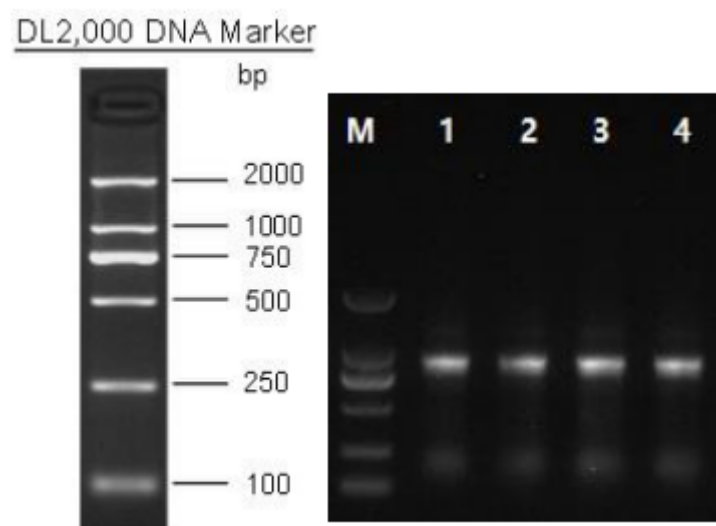

**Figure S2.** Total RNA was checked by agarose gel electrophoresis. Swimming lane numbers (1~4) represent the control (*Daphnia magna* from the diet of green algae only), *Daphnia magna* from the diet of green algae treated with 135  $\mu\text{g/L}$  r-AgNCs (without 0.5 mM of L-cysteine), *Daphnia magna* from the diet of green algae treated with 135  $\mu\text{g/L}$  r-AgNCs (with 0.5 mM of L-cysteine) and *Daphnia magna* from the diet of green algae treated with 10  $\mu\text{g/L}$  silver ions, respectively. Each treatment was done in biological quadruplicates.

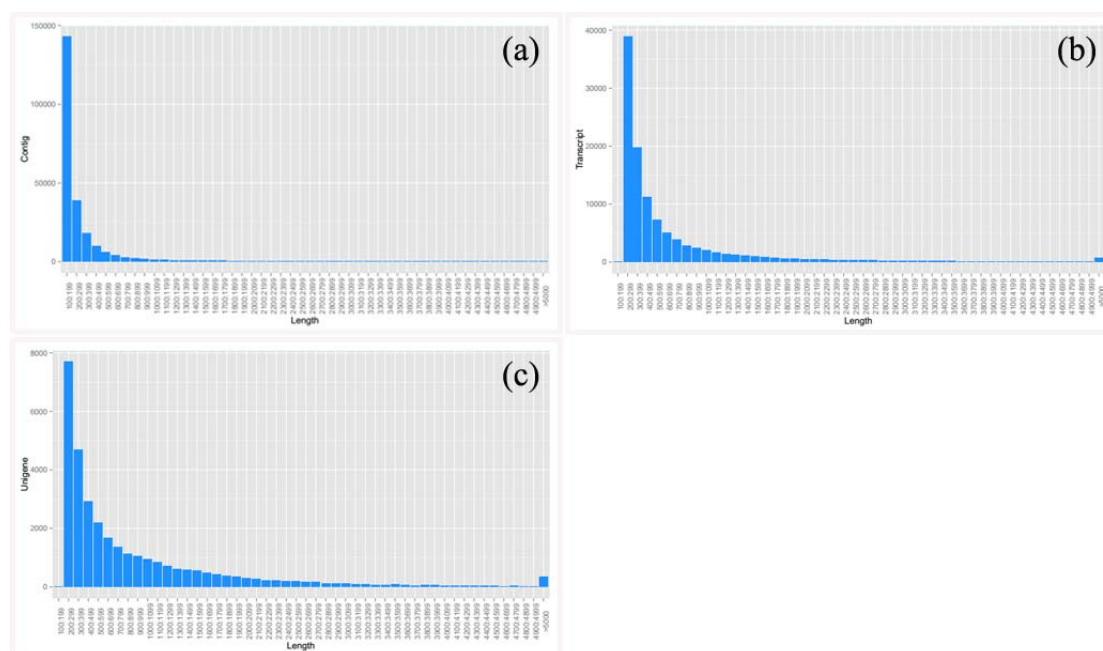

**Figure S3.** Histogram of length distribution of contiges (a), transcripts (b) and unigenes (c), with the number of contiges, transcripts and unigenes on the y-axis and the length distribution on the x-axis.

**Table S3.** Illumina de novo assembly statistics of transcriptomic profiles of *Daphnia magna* from green algae diet. (1) Samples A, B, C and D represent the control (*Daphnia magna* from the diet of green algae only), *Daphnia magna* from the diet of green algae treated with 135 µg/L r-AgNCs (without 0.5 mM of L-cysteine), *Daphnia magna* from the diet of green algae treated with 135 µg/L r-AgNCs (with 0.5 mM of L-cysteine) and *Daphnia magna* from the diet of green algae treated with 10 µg/L silver ions, respectively. (2) Q20: proportion of nucleotides with a quality value > 20 in raw sequencing reads. Q30: proportion of nucleotides with a quality value > 30 in raw sequencing reads. N50: unigene length-weighted median. GC %: percentage of G and C bases.

| Raw Sequencing Reads        |                   |                 |                  |                  |              |                 |      |
|-----------------------------|-------------------|-----------------|------------------|------------------|--------------|-----------------|------|
| Samples                     | Reads             | Raw Reads       | Raw Data (bp)    | Q20 (%)          | Q30 (%)      | N%              |      |
| A                           | Paired            | 34,015,174      | 5,102,276,100    | 98.26            | 95.93        | 0.000264        |      |
| B                           | Paired            | 45,970,242      | 6,895,536,300    | 98.29            | 95.9         | 0.000211        |      |
| C                           | Paired            | 34,935,830      | 5,240,374,500    | 98.3             | 95.97        | 0.000251        |      |
| D                           | Paired            | 45,869,432      | 6,880,414,800    | 98.36            | 96.05        | 0.000186        |      |
| High Quality Reads          |                   |                 |                  |                  |              |                 |      |
| Samples                     | Reads             | Clean Reads No. | Clean Data (bp)  | Clean Reads %    | Clean Data % |                 |      |
| A                           | Paired            | 33,908,648      | 5,008,006,022    | 99.68            | 98.15        |                 |      |
| B                           | Paired            | 45,829,500      | 6,731,987,734    | 99.69            | 97.62        |                 |      |
| C                           | Paired            | 34,803,358      | 5,106,294,418    | 99.62            | 97.44        |                 |      |
| D                           | Paired            | 45,735,154      | 6,728,898,660    | 99.7             | 97.79        |                 |      |
| Sequence Assembly Statistic |                   |                 |                  |                  |              |                 |      |
|                             | Total Length (bp) | Sequence No.    | Max. Length (bp) | Ave. Length (bp) | N50 (bp)     | > N50 Reads No. | GC % |
| Contig                      | 221,287,727       | 3,596,325       | 23,735           | 62               | 48           | 859,954         | 50.4 |
| Transcript                  | 72,901,724        | 108,954         | 23,712           | 669              | 1,009        | 17,277          | 48.7 |
| Unigene                     | 29,549,817        | 32,009          | 23,712           | 923              | 1,517        | 5,454           | 49.6 |

**Table S4.** Annotation of unigenes of *Daphnia magna* transcriptome.

| <b>Database</b> | <b>Numbers of annotated<br/>unigenes</b> | <b>Percentage of annotated<br/>unigenes</b> |
|-----------------|------------------------------------------|---------------------------------------------|
| NR              | 32,009                                   | 100 %                                       |
| GO              | 22,532                                   | 70.39 %                                     |
| KEGG            | 5,761                                    | 18 %                                        |
| eggNOG          | 29,260                                   | 91.41 %                                     |
| Swissprot       | 26,943                                   | 84.17 %                                     |
| In all database | 4,841                                    | 15.12 %                                     |

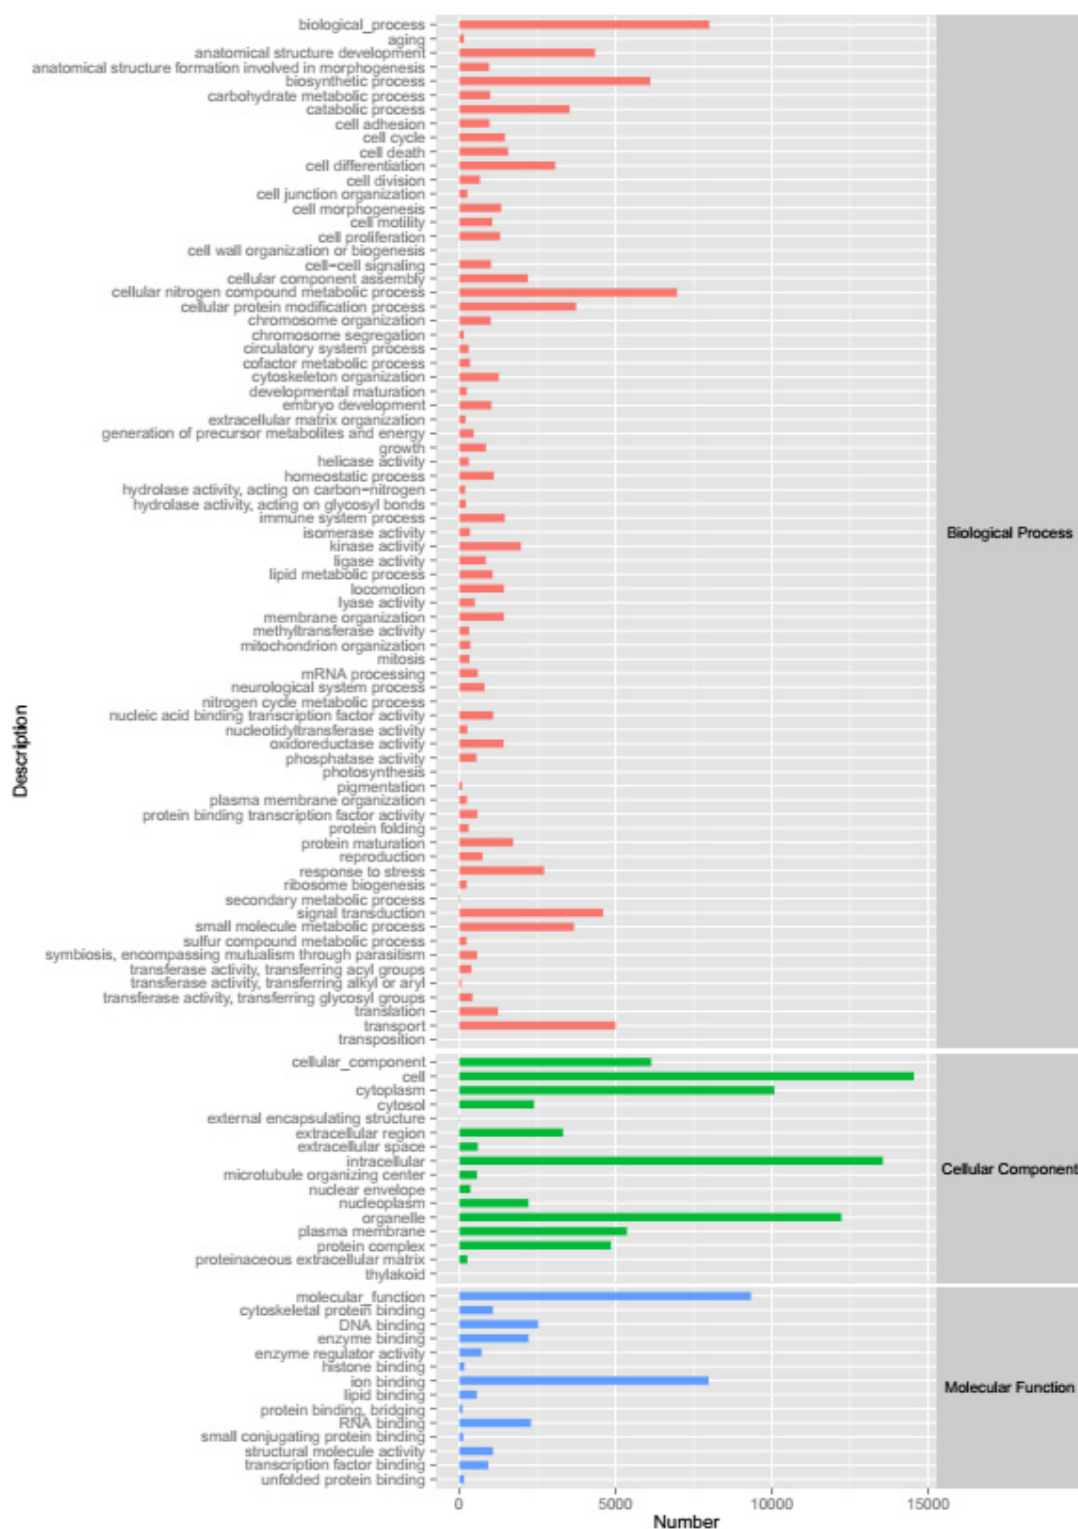

**Figure S4.** The Gene Ontology (GO) annotations of unigenes. The bars represent the number of unigenes (x-axis) in different GO terms (y-axis).

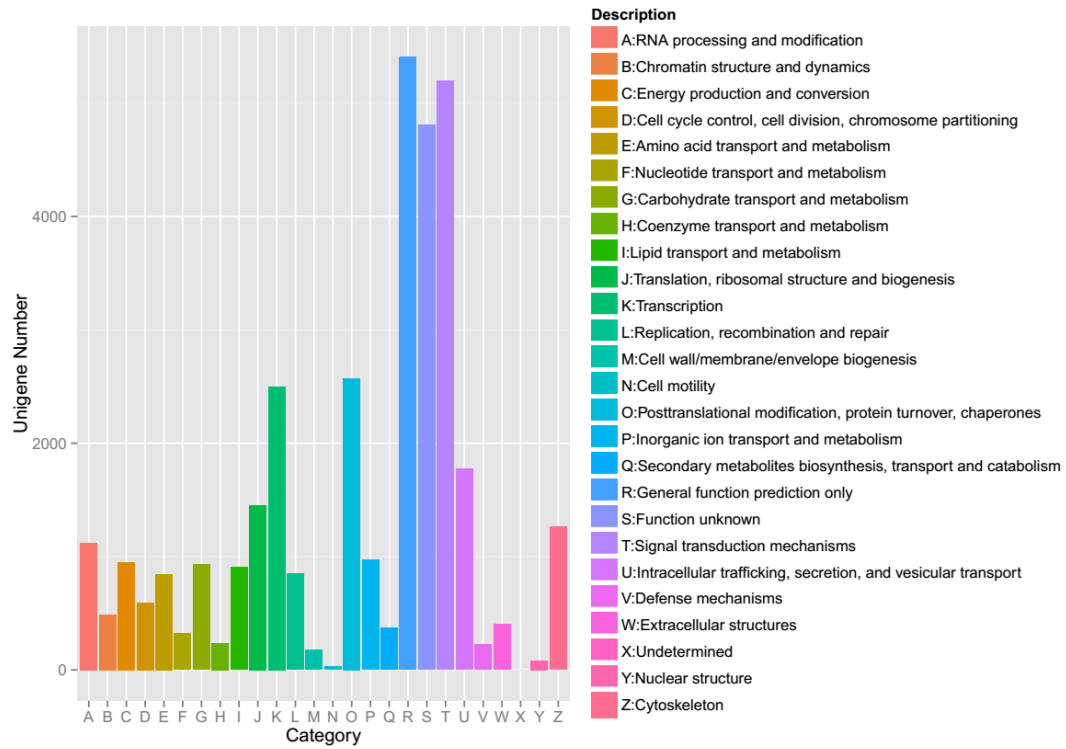

**Figure S5.** The Evolutionary genealogy of genes: Non-supervised Orthologous Groups (eggNOG) annotations of unigenes. The bars represent the number of unigenes (y-axis) in different eggNOG categories (x-axis).



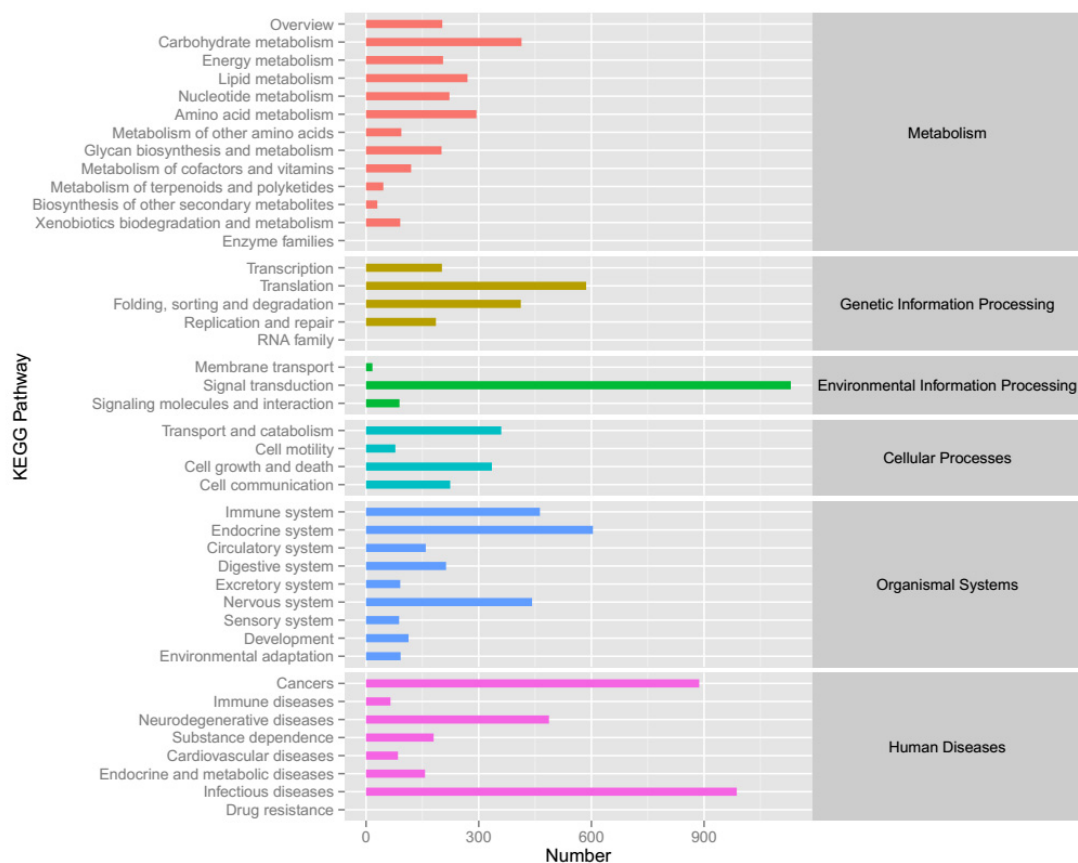

**Figure S6.** The Kyoto Encyclopedia of Genes and Genomes (KEGG) annotations of unigenes. The bars represent the number of unigenes (x-axis) in different KEGG metabolic pathways (y-axis).

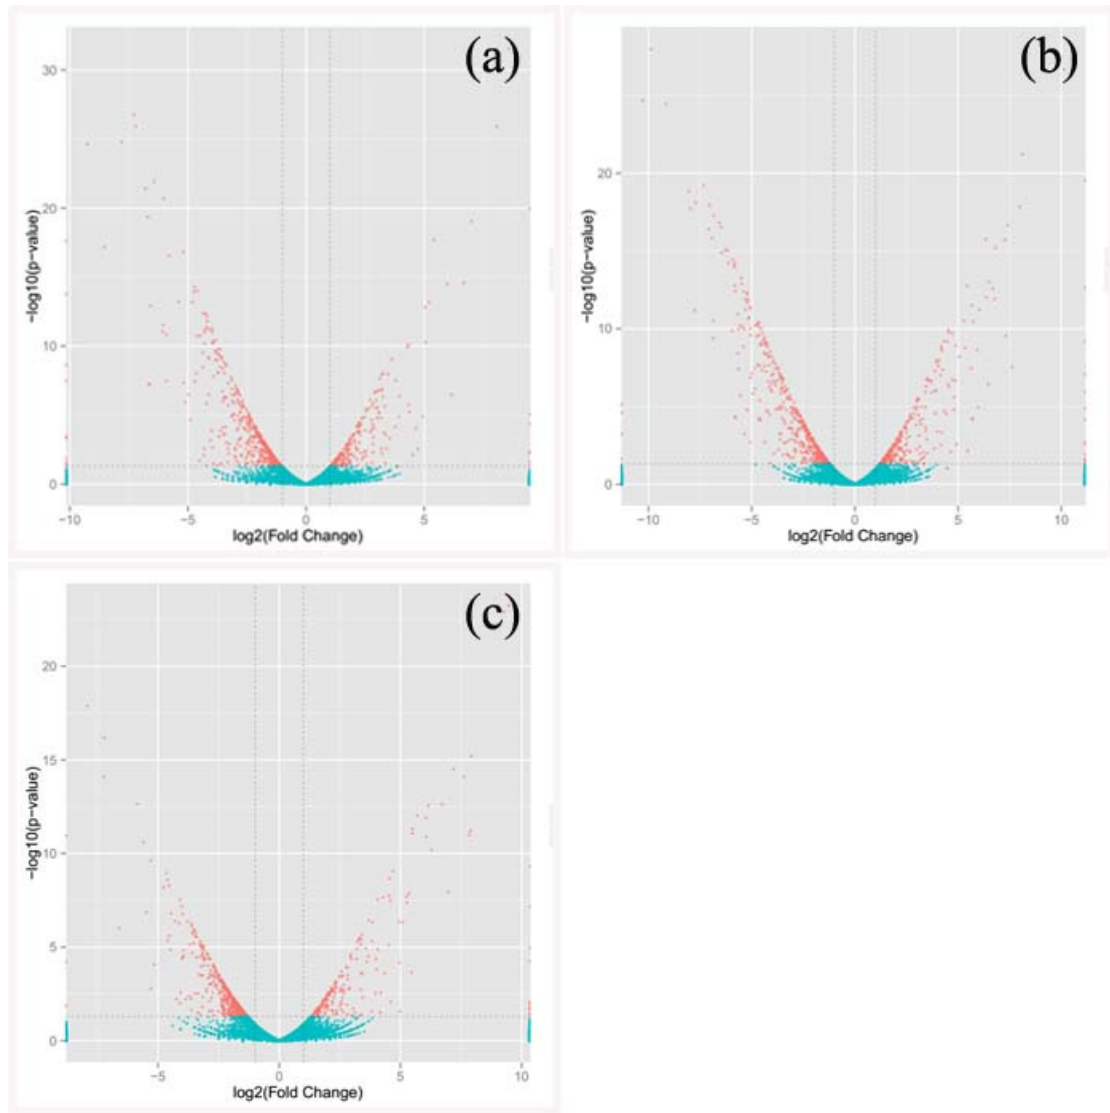

**Figure S7.** “Volcano plot” of  $\log_2(\text{fold change})$  versus  $-\log_{10}(p\text{-value})$  of differentially expressed genes derived from *Daphnia magna* fed a diet of green algae treated with 135  $\mu\text{g/L}$  r-AgNCs (without 0.5 mM of L-cysteine) (a), 135  $\mu\text{g/L}$  r-AgNCs (with 0.5 mM of L-cysteine) (b) and 10  $\mu\text{g/L}$  silver ions (c), compared to the control (*Daphnia magna* from the diet of green algae only), respectively. Red spots and blue spots represent differentially expressed genes ( $|\text{fold change}| > 2$  and  $p\text{-value} < 0.05$ ) and no difference in gene expression, respectively.



**Table S5.** List of differentially expressed genes for the digestive system and lipid metabolism of *Daphnia magna* after being fed a diet of algae treated with silver for 48h. Shades of red, green and blue indicate up- and down-regulation of target genes from each silver treatment compared with the controls and no differential expression of genes (Unigenes, background genes), respectively.

| <b>Digestive system of <i>Daphnia magna</i></b> |                    |               |                            |                |                                                       |
|-------------------------------------------------|--------------------|---------------|----------------------------|----------------|-------------------------------------------------------|
| <b>Pancreatic secretion</b>                     |                    |               |                            |                |                                                       |
| <b>Gene ID</b>                                  | <b>Gene Symbol</b> | <b>Ag NCs</b> | <b>Ag NCs + L-cysteine</b> | <b>Ag ions</b> | <b>Gene Description</b>                               |
| c75537_g1_i1                                    | PLA2G,<br>SPLA2    |               |                            |                | secretory phospholipase A2                            |
| c22033_g1_i2                                    | PLA2G,<br>SPLA2    |               |                            |                | secretory phospholipase A2                            |
| c36635_g1_i1                                    | CLCA4              |               |                            |                | calcium-activated chloride channel regulator 4        |
| c27143_g2_i1                                    | ATP1A              |               |                            |                | sodium/potassium-transporting ATPase subunit<br>alpha |
| c35469_g1_i2                                    | ADCY3              |               |                            |                | adenylate cyclase 3                                   |
| <b>Bile secretion</b>                           |                    |               |                            |                |                                                       |
| c26535_g1_i1                                    | HMGCR              |               |                            |                | hydroxymethylglutaryl-CoA reductase (NADPH)           |

|                                                 |                 |  |  |  |                                                                                                        |
|-------------------------------------------------|-----------------|--|--|--|--------------------------------------------------------------------------------------------------------|
| c27143_g2_i1                                    | ATP1A           |  |  |  | sodium/potassium-transporting ATPase subunit<br>alpha                                                  |
| c35469_g1_i2                                    | ADCY3           |  |  |  | adenylate cyclase 3                                                                                    |
| <b>Protein digestion and absorption</b>         |                 |  |  |  |                                                                                                        |
| c28996_g1_i1                                    | COL1A5          |  |  |  | collagen, type I/II/III/V/XI/XXIV/XXVII, alpha                                                         |
| c36721_g2_i4                                    | COL9A           |  |  |  | collagen, type IX, alpha                                                                               |
| c27143_g2_i1                                    | ATP1A           |  |  |  | sodium/potassium-transporting ATPase subunit<br>alpha                                                  |
| c30005_g1_i1                                    | SLC16A10        |  |  |  | MFS transporter, MCP family, solute carrier family<br>16 (monocarboxylic acid transporters), member 10 |
| c33004_g1_i1                                    | SLC8A, NCX      |  |  |  | solute carrier family 8 (sodium/calcium exchanger)                                                     |
| <b>Fat digestion and absorption</b>             |                 |  |  |  |                                                                                                        |
| c22033_g1_i2                                    | PLA2G,<br>SPLA2 |  |  |  | secretory phospholipase A2                                                                             |
| c75537_g1_i1                                    | PLA2G,<br>SPLA2 |  |  |  | secretory phospholipase A2                                                                             |
| <b>Lipid metabolism of <i>Daphnia magna</i></b> |                 |  |  |  |                                                                                                        |

| Fatty acid elongation                |                         |        |                     |         |                                                                             |
|--------------------------------------|-------------------------|--------|---------------------|---------|-----------------------------------------------------------------------------|
| Gene ID                              | Gene Symbol             | Ag NCs | Ag NCs + L-cysteine | Ag ions | Gene Description                                                            |
| c34043_g1_i2                         | HSD17B12,<br>KAR, IFA38 |        |                     |         | 17beta-estradiol 17-dehydrogenase / very-long-chain 3-oxoacyl-CoA reductase |
| c27461_g1_i1                         | ELOVL4                  |        |                     |         | elongation of very long chain fatty acids protein 4                         |
| c14600_g1_i2                         | ELOVL4                  |        |                     |         | elongation of very long chain fatty acids protein 4                         |
| Cutin, suberine and wax biosynthesis |                         |        |                     |         |                                                                             |
| c41268_g1_i1                         | FAR                     |        |                     |         | fatty acyl-CoA reductase                                                    |
| c52253_g1_i1                         | FAR                     |        |                     |         | fatty acyl-CoA reductase                                                    |
| c8335_g1_i1                          | FAR                     |        |                     |         | fatty acyl-CoA reductase                                                    |
| Steroid biosynthesis                 |                         |        |                     |         |                                                                             |
| c30643_g1_i1                         | LIPA                    |        |                     |         | lysosomal acid lipase/cholesteryl ester hydrolase                           |
| c35983_g1_i1                         | LIPA                    |        |                     |         | lysosomal acid lipase/cholesteryl ester hydrolase                           |
| Steroid hormone biosynthesis         |                         |        |                     |         |                                                                             |
| c34043_g1_i2                         | HSD17B12,<br>KAR, IFA38 |        |                     |         | 17beta-estradiol 17-dehydrogenase / very-long-chain 3-oxoacyl-CoA reductase |
| c73788_g1_i1                         | UGT                     |        |                     |         | glucuronosyltransferase                                                     |

|                                       |                 |  |  |  |                                       |
|---------------------------------------|-----------------|--|--|--|---------------------------------------|
| c35122_g1_i1                          | UGT             |  |  |  | glucuronosyltransferase               |
| <b>Glycerophospholipid metabolism</b> |                 |  |  |  |                                       |
| c41909_g1_i1                          | ACHE            |  |  |  | acetylcholinesterase                  |
| c30655_g1_i4                          | DGK, dgkA       |  |  |  | diacylglycerol kinase (ATP dependent) |
| c75537_g1_i1                          | PLA2G,<br>SPLA2 |  |  |  | secretory phospholipase A2            |
| c22033_g1_i2                          | PLA2G,<br>SPLA2 |  |  |  | secretory phospholipase A2            |
| c26159_g1_i1                          | ACHE            |  |  |  | acetylcholinesterase                  |
| <b>Ether lipid metabolism</b>         |                 |  |  |  |                                       |
| c75537_g1_i1                          | PLA2G,<br>SPLA2 |  |  |  | secretory phospholipase A2            |
| c22033_g1_i2                          | PLA2G,<br>SPLA2 |  |  |  | secretory phospholipase A2            |
| <b>Arachidonic acid metabolism</b>    |                 |  |  |  |                                       |
| c75537_g1_i1                          | PLA2G,<br>SPLA2 |  |  |  | secretory phospholipase A2            |

|                                        |                 |  |  |  |                            |
|----------------------------------------|-----------------|--|--|--|----------------------------|
| c22033_g1_i2                           | PLA2G,<br>SPLA2 |  |  |  | secretory phospholipase A2 |
| <b>Linoleic acid metabolism</b>        |                 |  |  |  |                            |
| c75537_g1_i1                           | PLA2G,<br>SPLA2 |  |  |  | secretory phospholipase A2 |
| c22033_g1_i2                           | PLA2G,<br>SPLA2 |  |  |  | secretory phospholipase A2 |
| <b>alpha-Linolenic acid metabolism</b> |                 |  |  |  |                            |
| c22033_g1_i2                           | PLA2G,<br>SPLA2 |  |  |  | secretory phospholipase A2 |
| c75537_g1_i1                           | PLA2G,<br>SPLA2 |  |  |  | secretory phospholipase A2 |
