# Supplementary material for: Genotoxic Effects on Daphnia magna Fed with Aquatic Green Algae Exposed to Silver Nanoclusters
Source: MDPI journal article supplement (doi:10.3390/w15183172), 2023-09-05
Supplement: s1 [file s1]

Archive with 1 entries (1 files):
- water-2559252-supplementary.pdf
